# Supplementary material
Source: PubMed Central journal article supplement (PMC9930641)

---

**Supplementary information**

---

**Structures and mechanisms of tRNA  
methylation by METTL1–WDR4**

---

In the format provided by the  
authors and unedited

## Supplementary Information for:

# Structures and Mechanisms of tRNA Methylation by METTL1-WDR4

Authors:

Victor M. Ruiz-Arroyo<sup>1</sup>, Rishi Raj<sup>1</sup>, Kesavan Babu<sup>1</sup>, Otgonbileg Onolbaatar<sup>1</sup>, Paul H. Roberts<sup>1</sup>, Yunsun Nam<sup>1\*</sup>

Affiliations:

<sup>1</sup> Department of Biochemistry, Department of Biophysics, Simmons Comprehensive Cancer Center, University of Texas Southwestern Medical Center, Dallas, TX 75390, USA

\* Corresponding Author ( [yunsun.nam@utsouthwestern.edu](mailto:yunsun.nam@utsouthwestern.edu) )

Table of Contents

Page

1. **Supplementary Information Figure. 1:** Primer list to generate tRNAs. DNA primer list used for tRNA in vitro transcription. .... 3
2. **Supplementary Information Figure 2:** Uncropped gels used for figures. a, Uncropped scanned SDS-PAGE image visualized using stain-free (Bio-Rad) used for Extended data Fig. 1a. b-c, Uncropped scanned images of EMSA gels used for Extended data Fig. 1b-c. d, Uncropped scanned images of EMSA gels used for Extended data Fig. 6e. .... 4

| <b>WT tRNA</b>             | <b>Sequence (5'-3')</b>                                                     |
|----------------------------|-----------------------------------------------------------------------------|
| Ala_AGC-Full               | GGGGATGTAGCTCAGTGGTAGAGCGCATGCTTAGCATGCATGAGGTCCCAGGTTTCGATCCCCAGCATCTCCA   |
| Fw_Ala-AGC                 | GCGAAATTAATACGACTCACTATAGGGGATGTAGCTCAGTGGTAGAGCGCATGCTTAGC                 |
| Rv_Ala-AGC                 | TGGAGATGCTGGGGATCGAACCCGGGACCTCATGCATGCTAAGCATGCCCTCTACCAC                  |
| Val-AAC                    | GTTCCGTTAGTGTAGTGGTTATCACGTTCCGCTAACACGCGAAAGGTCCCAGGTTTCAAACCCGGGCGAAACA   |
| Fw_Val-AAC                 | GCGAAATTAATACGACTCACTATAGTTTCCGTTAGTGTAGTGGTTATCACGTTCCGCTAAC               |
| Rv_Val-AAC                 | TGTTTCCGCCCCGTTTTCGAACCCGGGACCTTTCCGCTGTTAGGCGAACGTGATAACCACT               |
| Phe-GAA                    | GCCGAAATAGCTCAGTTGGGAGAGCGTTAGACTGAAGATCTAAAGTCCCCTGGTTCCATCCCAGGTTTTCGGCA  |
| Fw_Phe-GAA                 | GCGAAATTAATACGACTCACTATAGCCGAAATAGCTCAGTTGGGAGAGCGTTAGACTGA                 |
| Rv_Phe-GAA                 | TGCCGAAACCCGGGATCGAACCCAGGGACCTTTAGATCTTCACTAACGCTCTCCCACT                  |
| Cys-GCA                    | GGGGGTATAGCTCAGGTGGTAGAGCATTTGACTGCAGATCAAGAGGTCCCAGGTTCAAATCCCAGGTTGCCCCCT |
| Fw_Cys-GCA                 | GCGAAATTAATACGACTCACTATAGGGGATAGCTCAGTGGTAGAGCATTTGACTGC                    |
| Rv_Cys-GCA                 | AGGGGGCACCCGGATTGAAACCCGGGACCTTTGATCTGCAGTCAAATGCTCTACCACCT                 |
| Lys-TTT                    | GCCCCGATAGCTCAGTCGGTAGAGCATCAGACTTTTAACTCTGAGGGTCCAGGGTTCAAGTCCCTGTTCCGGGCG |
| Fw_Lys-TTT                 | GCGAAATTAATACGACTCACTATAGCCCGGATAGCTCAGTCGGTAGAGCATCAGACTTT                 |
| Rv_Lys-TTT                 | CGCCCCAACAGGGACTTGAACCCCTGGACCTCAGATTAAGTCTGATGCTCTACCGACT                  |
| Lys-CTT                    | GCCCCGCTAGCTCA GTCGGTAGAGCATGGGACTCTTAATCCCAGGGTCGTGGGTTCCAGCCCCACGTTGGGCG  |
| Fw_Lys-CTT                 | GCGAAATTAATACGACTCACTATAGCCCGGCTAGCTCAGTCGGTAGAGCATGGGACTCT                 |
| Rv_Lys-CTT                 | CGCCCCACGTGGGGCTCGAACCCACGACCTGGGATTAAGAGTCCCATGCTCTACCGAC                  |
| Arg-TCT                    | GTCTCTGTGGCGCAATGGACGAGCGCGCTGGACTTCTAATCCAGAGGTTCCCAGGTTCCAGTCCCAGGCGAGATG |
| Fw_Arg-TCT                 | GCGAAATTAATACGACTCACTATAGTCTCTGTGGCGCAATGGACGAGCGCGCTGGACTT                 |
| Rv_Arg-TCT                 | CATCTCTGCCGGGACTCGAACCCGGAACCTCTGGATTAGAAGTCCAGCGCGCTGTCAT                  |
| Trp-CCA                    | GGCCTCGTGGCGCAAC GGTAGCGCGTCTGACTCCAGATCAGAAGGTTGCGTGTTCAAATCACGTCGGGGTCA   |
| Fw_Trp-CCA                 | GCGAAATTAATACGACTCACTATAGGCTCGTGGCGCAACGGTAGCGCTCTGACTCCA                   |
| Rv_Trp-CCA                 | TGACCCCGACGTGATTTGAACACGCAACCTTCTGATCTGGAGTCAGACGCGCTACC                    |
| Tyr-GTA-Full               | CCTTCGATAGCTCA GTTGGTAGAGCGGAGGACTGTAGATCCTTAGGTGCTGGTTCGAATCCGGCTCGAAGGA   |
| Fw_Tyr-GTA                 | GCGAAATTAATACGACTCACTATACCTTCGATAGCTCAGTTGGTAGAGCGGAGGACTGT                 |
| Rv_Tyr-GTA                 | TCCTTCGAGCCGGATTGCAACCCAGCGACCTAAGGATCT ACAGTCTCCGCTCTACCAAC                |
| Gln-CTG                    | GGTTCATGGTGAATGGTTAGCACTCTGGACTCTGAATCCAGCGATCCGAGTTCAAATCTCGGTGGAACCT      |
| Fw_Gln_CTG                 | GCGAAATTAATACGACTCACTATAGGTTCCATGGTGAATGGTTAGCACTCTGGACTCTG                 |
| Rv_Gln_CTG                 | AGGTTCCACCGAGATTTGAACTCGGATCGCTGGATTGAGTCCAGAGTGCTAAC                       |
| <b>Mutant tRNA primers</b> | <b>Sequence (5'-3')</b>                                                     |
| Lys-TTT G44A               | GCCCCGATAGCTCAGTCGGTAGAGCATCAGACTTTTAACTCTGAAGGTCCAGGGTTCAAGTCCCTGTTCCGGGCG |
| Fw_Lys-TTT                 | GCGAAATTAATACGACTCACTATAGCCCGGATAGCTCAGTCGGTAGAGCATCAGACTTT                 |
| Rv_Lys-TTT_G44             | CGCCCCAACAGGGACTTGAACCCCTGGACCTCAGATTAAGTCTGATGCTCTACCGAC                   |
| Lys-TTT_G45                | GCCCCGATAGCTCAGTCGGTAGAGCATCAGACTTTTAACTCTGAGAGTCCAGGGTTCAAATCCCTGTTCCGGGCG |
| Fw_Lys-TTT                 | GCGAAATTAATACGACTCACTATAGCCCGGATAGCTCAGTCGGTAGAGCATCAGACTTT                 |
| Rv_Lys-TTT_G45             | CGCCCCAACAGGGACTTGAACCCCTGGACTCTCAGATTAAGTCTGATGCTCTACCGAC                  |
| Lys-TTT G46A               | GCCCCGATAGCTCAGTCGGTAGAGCATCAGACTTTTAACTCTGAGGATCCAGGGTTCAAGTCCCTGTTCCGGGCG |
| Fw_Lys-TTT                 | GCGAAATTAATACGACTCACTATAGCCCGGATAGCTCAGTCGGTAGAGCATCAGACTTT                 |
| Rv_Lys-TTT_G46             | CGCCCCAACAGGGACTTGAACCCCTGGATCCTCAGATTAAGTCTGATGCTCTACCGAC                  |
| Gln_CTG_CGGUC              | GGTTCATGGTGAATGGTTAGCACTCTGGACTCTGAATCCAGCGGTCGAGTTCAAATCTCGGTGGAACCT       |
| Fw_Gln_CTG                 | GCGAAATTAATACGACTCACTATAGGTTCCATGGTGAATGGTTAGCACTCTGGACTCTG                 |
| Rv_Gln_CTG_CGGUC           | AGGTTCCACCGAGATTTGAACTCGGACCGCTGGATTGAGTCCAGAGTGCTAACCATACCCATGG            |
| Gln_CTG_AGGUC              | GGTTCATGGTGAATGGTTAGCACTCTGGACTCTGAATCCAGAGGTCGAGTTCAAATCTCGGTGGAACCT       |
| Fw_Gln_CTG                 | GCGAAATTAATACGACTCACTATAGGTTCCATGGTGAATGGTTAGCACTCTGGACTCTG                 |
| Rv_Gln_CTG_AGGUC           | AGGTTCCACCGAGATTTGAACTCGGACCTCTGGATTGAGTCCAGAGTGCTAAC                       |
| Gln_CTG_GGGUC              | GGTTCATGGTGAATGGTTAGCACTCTGGACTCTGAATCCAGGGGTCGAGTTCAAATCTCGGTGGAACCT       |
| Fw_Gln_CTG                 | GCGAAATTAATACGACTCACTATAGGTTCCATGGTGAATGGTTAGCACTCTGGACTCTG                 |
| Rv_Gln_CTG_GGGUC           | AGGTTCCACCGAGATTTGAACTCGGACCCCTGGATTGAGTCCAGAGTGCTAAC                       |

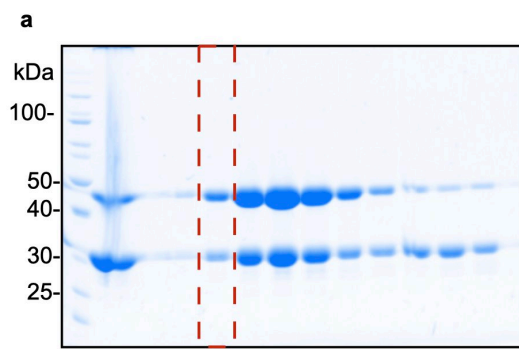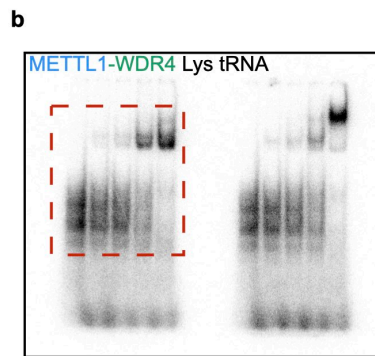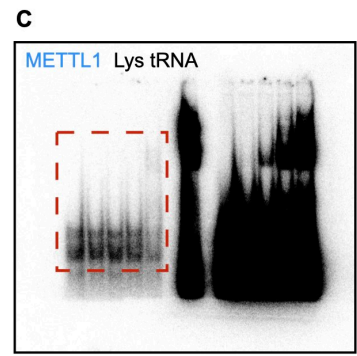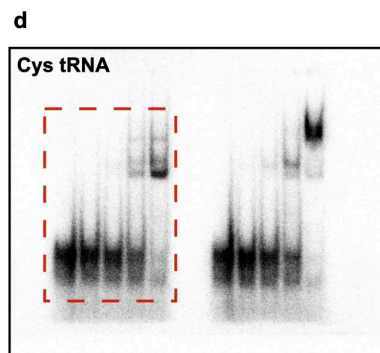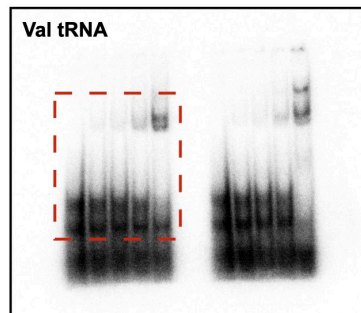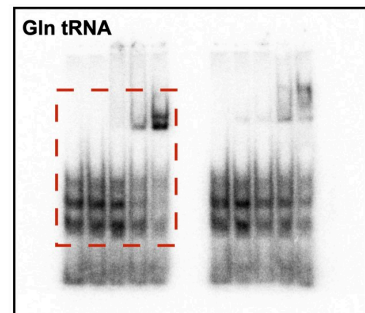

Supplement: NIHMS1866060-supplement-1866060_Sup_Info.pdf [file NIHMS1866060-supplement-1866060_Sup_Info.pdf]
